# Supplementary material for: DNA Barcoding and Fertilization Strategies in Sideritis syriaca subsp. syriaca, a Local Endemic Plant of Crete with High Medicinal Value
Source: MDPI journal article supplement (doi:10.3390/ijms25031891), 2024-02-04
Supplement: s1 [file s1]

**Supplementary material Methods S1.** Chemical composition of fertilizers used in the experimental procedure (Theofrastos company, Korinthos, Greece) and fertilization treatments applied in the pilot cultivation of *Sideritis syriaca* subsp. *syriaca* with other Cretan endemic plants at the premises of the Hellenic Mediterranean University

**Scheme A.** Integrated nutrient management (INM) by foliar application (INM-fa): The nutrient solution consisted of THEORUN at 7 ml L<sup>-1</sup>, THEOCAL at 1.5 g L<sup>-1</sup>, THEOFAST at 5 ml L<sup>-1</sup>, 10-47-10 (AGRI.FE.M. LTD Fertilizers, Greece) at 3.2 g L<sup>-1</sup>, K<sub>2</sub>SO<sub>4</sub> (0-0-52, AGRI.FE.M. LTD Fertilizers, Greece) at 2.07 g L<sup>-1</sup>, micronutrients (Plex Mix, AGRI.FE.M. LTD Fertilizers, Greece) at 1.5 ml L<sup>-1</sup> and MgSO<sub>4</sub> (Mg 25.6%, AGRI.FE.M. LTD Fertilizers, Greece) at 0.6 g L<sup>-1</sup>.

**Scheme B.** Conventional inorganic fertilization by foliar application (ChF-fa): The nutrient solution consisted of NH<sub>4</sub>NO<sub>3</sub> (34,4-0-0, Neofert®, Neochim PLC, Bulgaria) at 2.7 g L<sup>-1</sup>, Ca(NO<sub>3</sub>)<sub>2</sub> (NITROCAL, Agrohimiiki, Greece) at 1.7 g L<sup>-1</sup>, 10-47-10 at 3.2 g L<sup>-1</sup>, K<sub>2</sub>SO<sub>4</sub> (0-0-52) at 2.27 g L<sup>-1</sup>, micronutrients Plex Mix at 1.5 ml L<sup>-1</sup> and MgSO<sub>4</sub> (Mg 25.6 %) at 0.6 g L<sup>-1</sup>.

**Scheme C.** Control, with foliar and soil applications with tap water.

**Scheme D.** INM by soil application (INM-sa): The nutrient solution consisted of THEORUN at 7 ml L<sup>-1</sup>, THEOCAL at 1.5 g L<sup>-1</sup>, THEOMASS at 10 ml L<sup>-1</sup>, 10-47-10 at 3.2 g L<sup>-1</sup>, K<sub>2</sub>SO<sub>4</sub> (0-0-52) at 2.1 g L<sup>-1</sup>, micronutrients Plex Mix at 1.5 ml L<sup>-1</sup> and MgSO<sub>4</sub> (Mg 25.6 %) at 0.3 g L<sup>-1</sup>.

**Scheme E.** Conventional inorganic fertilization by soil application (ChF-sa): The nutrient solution was consisted of NH<sub>4</sub>NO<sub>3</sub> (34,4-0-0) at 2.7 g L<sup>-1</sup>, Ca(NO<sub>3</sub>)<sub>2</sub> (NITROCAL) at 1.7 g L<sup>-1</sup>, 10-47-10 at 3.2 g L<sup>-1</sup>, K<sub>2</sub>SO<sub>4</sub> (0-0-52) at 2.3 g L<sup>-1</sup>, micronutrients, Plex Mix at 1.5 ml L<sup>-1</sup> and MgSO<sub>4</sub> (Mg 25.6 %) at 0.3 g L<sup>-1</sup>.

**Scheme F.** Mixture of plant extracts as biostimulant by soil application (MPE-sa): The nutrient solution consisted of THEOMASS at 10 ml L<sup>-1</sup>.

**Supplementary Material Table S1.** Alignment presenting the nucleotide differences among 15 *Sideritis* species based on the molecular plastid markers *rbcL* and *trnL/trnF*. Accession numbers of DNA sequences obtained in this study from the GenBank are indicated next to taxon names. The clade marked in orange represents *S. syriaca* subsp. *syriaca* GR-1-BBGK-15,5939 studied herein. The taxon marked with asterisk (\*) is characterized as *S. syriaca* in the database, but based on the origin of the specimen, it should be identified as *S. euboica* due to the narrow distribution of *S. syriaca* in Crete.

| DNA Sequences | Translated Protein Sequences |
|---------------|------------------------------|
|---------------|------------------------------|

[illegible][illegible]

| Species/Abbrev                      |   |   |   |   |   |   |   |   |   |   |   |   |   |   |   |   |   |   |   |   |   |   |   |   |   |   |   |   |   |   |   |   |   |   |   |   |   |   |   |   |   |   |   |   |   |   |   |   |   |   |   |   |   |   |   |   |   |   |   |   |   |   |   |   |   |   |   |   |   |   |   |   |   |   |   |   |   |   |   |   |   |   |   |   |   |   |   |   |   |   |   |   |   |   |   |   |   |   |   |   |   |   |   |   |   |   |   |   |   |   |   |   |   |   |   |   |   |   |   |   |   |   |   |   |   |   |   |   |   |   |   |   |   |   |   |   |   |   |   |   |   |   |   |   |   |   |   |   |   |   |   |   |   |   |   |   |   |   |   |   |   |   |   |   |   |   |   |   |   |   |   |   |   |   |   |   |   |   |   |   |   |   |   |   |   |   |   |   |   |   |   |   |   |   |   |   |   |   |   |   |   |   |   |   |   |   |   |   |   |   |   |   |   |   |   |   |   |   |   |   |   |   |   |   |   |   |   |   |   |   |   |   |   |   |   |   |   |   |   |   |   |   |   |   |   |   |   |   |   |   |   |   |   |   |   |   |   |   |   |   |   |   |   |   |   |   |   |   |   |   |   |   |   |   |   |   |   |   |   |   |   |   |   |   |   |   |   |   |   |   |   |   |   |   |   |   |   |   |   |   |   |   |   |   |   |   |   |   |   |   |   |   |   |   |   |   |   |   |   |   |   |   |   |   |   |   |   |   |   |   |   |   |   |   |   |   |   |   |   |   |   |   |   |   |   |   |   |   |   |   |   |   |   |   |   |   |   |   |   |   |   |   |   |   |   |   |   |   |   |   |   |   |   |   |   |   |   |   |   |   |   |   |   |   |   |   |   |   |   |   |   |   |   |   |   |   |   |   |   |   |   |   |   |   |   |   |   |   |   |   |   |   |   |   |   |   |   |   |   |   |   |   |   |   |   |   |   |   |   |   |   |   |   |   |   |   |   |   |   |   |   |   |   |   |   |   |   |   |   |   |   |   |   |   |   |   |   |   |   |   |   |   |   |   |   |   |   |   |   |   |   |   |   |   |   |   |   |   |   |   |   |   |   |   |   |   |   |   |   |   |   |   |   |   |   |   |   |   |   |   |   |   |   |   |   |   |   |   |   |   |   |   |   |   |   |   |   |   |   |   |   |   |   |   |   |   |   |   |   |   |   |   |   |   |   |   |   |   |   |   |   |   |   |   |   |   |   |   |   |   |   |   |   |   |   |   |   |   |   |   |   |   |   |   |   |   |   |   |   |   |   |   |   |   |   |   |   |   |   |   |   |   |   |   |   |   |   |   |   |   |   |   |   |   |   |   |   |   |   |   |   |   |   |   |   |   |   |   |   |   |   |   |   |   |   |   |   |   |   |   |   |   |   |   |   |   |   |   |   |   |   |   |   |   |   |   |   |   |   |   |   |   |   |   |   |   |   |   |   |   |   |   |   |   |   |   |   |   |   |   |   |   |   |   |   |   |   |   |   |   |   |   |   |   |   |   |   |   |   |   |   |   |   |   |   |   |   |   |   |   |   |   |   |   |   |   |   |   |   |   |   |   |   |   |   |   |   |   |   |   |   |   |   |   |   |   |   |   |   |   |   |   |   |   |   |   |   |   |   |   |   |   |   |   |   |   |   |   |   |   |   |   |   |   |   |   |   |   |   |   |   |   |   |   |   |   |   |   |   |   |   |   |   |   |   |   |   |   |   |   |   |   |   |   |   |   |   |   |   |   |   |   |   |   |   |   |   |   |   |   |   |   |   |   |   |   |   |   |   |   |   |   |   |   |   |   |   |   |   |   |   |   |   |   |   |   |   |   |   |   |   |   |   |   |   |   |   |   |   |   |   |   |   |   |   |   |   |   |   |   |   |   |   |   |   |   |   |   |   |   |   |   |   |   |   |   |   |   |   |   |   |   |   |   |   |   |   |   |   |   |   |   |   |   |   |   |   |   |   |   |   |   |   |   |   |   |   |   |   |   |   |   |   |   |   |   |   |   |   |   |   |   |   |   |   |   |   |   |   |   |   |   |   |   |   |   |   |   |   |   |   |   |   |   |   |   |   |   |   |   |   |   |   |   |   |   |   |   |   |   |   |   |   |   |   |   |   |   |   |   |   |   |   |   |   |   |   |   |   |   |   |   |   |   |   |   |   |   |   |   |   |   |   |   |   |   |   |   |   |   |   |   |   |   |   |   |   |   |   |   |   |   |   |   |   |   |   |   |   |   |   |   |   |   |   |   |   |   |   |   |   |   |   |   |   |   |   |   |   |   |   |   |   |   |   |   |   |   |   |   |   |   |   |   |   |   |   |   |   |   |   |   |   |   |   |   |   |   |   |   |   |   |   |   |   |   |   |   |   |   |   |   |   |   |   |   |   |   |   |   |   |   |   |   |   |   |   |   |   |   |   |   |   |   |   |   |   |   |   |   |   |   |   |   |   |   |   |   |   |   |   |   |   |   |   |   |   |   |   |   |   |   |   |   |   |   |   |   |   |   |   |   |   |   |   |   |   |   |   |   |   |   |   |   |   |   |   |   |   |   |   |   |   |   |   |   |   |   |   |   |   |   |   |   |   |   |   |   |   |   |   |   |   |   |   |   |   |   |   |   |   |   |   |   |   |   |   |   |   |   |   |   |   |   |   |   |   |   |   |   |   |   |   |   |   |   |   |   |   |   |   |   |   |   |   |   |   |   |   |   |   |   |   |   |   |   |   |   |   |
|-------------------------------------|---|---|---|---|---|---|---|---|---|---|---|---|---|---|---|---|---|---|---|---|---|---|---|---|---|---|---|---|---|---|---|---|---|---|---|---|---|---|---|---|---|---|---|---|---|---|---|---|---|---|---|---|---|---|---|---|---|---|---|---|---|---|---|---|---|---|---|---|---|---|---|---|---|---|---|---|---|---|---|---|---|---|---|---|---|---|---|---|---|---|---|---|---|---|---|---|---|---|---|---|---|---|---|---|---|---|---|---|---|---|---|---|---|---|---|---|---|---|---|---|---|---|---|---|---|---|---|---|---|---|---|---|---|---|---|---|---|---|---|---|---|---|---|---|---|---|---|---|---|---|---|---|---|---|---|---|---|---|---|---|---|---|---|---|---|---|---|---|---|---|---|---|---|---|---|---|---|---|---|---|---|---|---|---|---|---|---|---|---|---|---|---|---|---|---|---|---|---|---|---|---|---|---|---|---|---|---|---|---|---|---|---|---|---|---|---|---|---|---|---|---|---|---|---|---|---|---|---|---|---|---|---|---|---|---|---|---|---|---|---|---|---|---|---|---|---|---|---|---|---|---|---|---|---|---|---|---|---|---|---|---|---|---|---|---|---|---|---|---|---|---|---|---|---|---|---|---|---|---|---|---|---|---|---|---|---|---|---|---|---|---|---|---|---|---|---|---|---|---|---|---|---|---|---|---|---|---|---|---|---|---|---|---|---|---|---|---|---|---|---|---|---|---|---|---|---|---|---|---|---|---|---|---|---|---|---|---|---|---|---|---|---|---|---|---|---|---|---|---|---|---|---|---|---|---|---|---|---|---|---|---|---|---|---|---|---|---|---|---|---|---|---|---|---|---|---|---|---|---|---|---|---|---|---|---|---|---|---|---|---|---|---|---|---|---|---|---|---|---|---|---|---|---|---|---|---|---|---|---|---|---|---|---|---|---|---|---|---|---|---|---|---|---|---|---|---|---|---|---|---|---|---|---|---|---|---|---|---|---|---|---|---|---|---|---|---|---|---|---|---|---|---|---|---|---|---|---|---|---|---|---|---|---|---|---|---|---|---|---|---|---|---|---|---|---|---|---|---|---|---|---|---|---|---|---|---|---|---|---|---|---|---|---|---|---|---|---|---|---|---|---|---|---|---|---|---|---|---|---|---|---|---|---|---|---|---|---|---|---|---|---|---|---|---|---|---|---|---|---|---|---|---|---|---|---|---|---|---|---|---|---|---|---|---|---|---|---|---|---|---|---|---|---|---|---|---|---|---|---|---|---|---|---|---|---|---|---|---|---|---|---|---|---|---|---|---|---|---|---|---|---|---|---|---|---|---|---|---|---|---|---|---|---|---|---|---|---|---|---|---|---|---|---|---|---|---|---|---|---|---|---|---|---|---|---|---|---|---|---|---|---|---|---|---|---|---|---|---|---|---|---|---|---|---|---|---|---|---|---|---|---|---|---|---|---|---|---|---|---|---|---|---|---|---|---|---|---|---|---|---|---|---|---|---|---|---|---|---|---|---|---|---|---|---|---|---|---|---|---|---|---|---|---|---|---|---|---|---|---|---|---|---|---|---|---|---|---|---|---|---|---|---|---|---|---|---|---|---|---|---|---|---|---|---|---|---|---|---|---|---|---|---|---|---|---|---|---|---|---|---|---|---|---|---|---|---|---|---|---|---|---|---|---|---|---|---|---|---|---|---|---|---|---|---|---|---|---|---|---|---|---|---|---|---|---|---|---|---|---|---|---|---|---|---|---|---|---|---|---|---|---|---|---|---|---|---|---|---|---|---|---|---|---|---|---|---|---|---|---|---|---|---|---|---|---|---|---|---|---|---|---|---|---|---|---|---|---|---|---|---|---|---|---|---|---|---|---|---|---|---|---|---|---|---|---|---|---|---|---|---|---|---|---|---|---|---|---|---|---|---|---|---|---|---|---|---|---|---|---|---|---|---|---|---|---|---|---|---|---|---|---|---|---|---|---|---|---|---|---|---|---|---|---|---|---|---|---|---|---|---|---|---|---|---|---|---|---|---|---|---|---|---|---|---|---|---|---|---|---|---|---|---|---|---|---|---|---|---|---|---|---|---|---|---|---|---|---|---|---|---|---|---|---|---|---|---|---|---|---|---|---|---|---|---|---|---|---|---|---|---|---|---|---|---|---|---|---|---|---|---|---|---|---|---|---|---|---|---|---|---|---|---|---|---|---|---|---|---|---|---|---|---|---|---|---|---|---|---|---|---|---|---|---|---|---|---|---|---|---|---|---|---|---|---|---|---|---|---|---|---|---|---|---|---|---|---|---|---|---|---|---|---|---|---|---|---|---|---|---|---|---|---|---|---|---|---|---|---|---|---|---|---|---|---|---|---|---|---|---|---|---|---|---|---|---|---|---|---|---|---|---|---|---|---|---|---|---|---|---|---|---|---|---|---|---|---|---|---|---|---|---|---|---|---|---|---|---|---|---|---|---|---|---|---|---|---|---|---|---|---|---|---|---|---|---|---|---|---|---|---|---|---|---|---|---|---|---|---|---|---|---|---|---|---|---|---|---|---|---|---|---|---|---|---|---|---|---|---|---|---|---|---|---|---|---|---|---|---|---|---|---|---|---|---|---|---|---|---|---|---|---|---|---|---|---|---|---|---|---|---|---|---|---|---|---|---|---|---|---|---|---|---|---|---|---|---|---|---|---|---|---|---|---|---|---|---|---|---|---|---|---|---|---|---|---|---|---|---|---|---|---|---|---|---|---|---|---|---|---|
| 1. s. canariensis MVB18149 DQ900798 | A | G | A | G | C | C | T | T | G | G | A | A | A | A | G | A | T | A | T | A | T | T | G | T | T | A | C | C | C | T | T | A | G | A | C | T | T | T | T | T | A | G | A | A | G | G | T | C | T | T | A | C | A | C | T | T | T | A | C | T | T | T | T | T | T | T | T | T | T | T | T | T | T | T | T | T | T | T | T | T | T | T | T | T | T | T | T | T | T | T | T | T | T | T | T | T | T | T | T | T | T | T | T | T | T | T | T | T | T | T | T | T | T | T | T | T | T | T | T | T | T | T | T | T | T | T | T | T | T | T | T | T | T | T | T | T | T | T | T | T | T | T | T | T | T | T | T | T | T | T | T | T | T | T | T | T | T | T | T | T | T | T | T | T | T | T | T | T | T | T | T | T | T | T | T | T | T | T | T | T | T | T | T | T | T | T | T | T | T | T | T | T | T | T | T | T | T | T | T | T | T | T | T | T | T | T | T | T | T | T | T | T | T | T | T | T | T | T | T | T | T | T | T | T | T | T | T | T | T | T | T | T | T | T | T | T | T | T | T | T | T | T | T | T | T | T | T | T | T | T | T | T | T | T | T | T | T | T | T | T | T | T | T | T | T | T | T | T | T | T | T | T | T | T | T | T | T | T | T | T | T | T | T | T | T | T | T | T | T | T | T | T | T | T | T | T | T | T | T | T | T | T | T | T | T | T | T | T | T | T | T | T | T | T | T | T | T | T | T | T | T | T | T | T | T | T | T | T | T | T | T | T | T | T | T | T | T | T | T | T | T | T | T | T | T | T | T | T | T | T | T | T | T | T | T | T | T | T | T | T | T | T | T | T | T | T | T | T | T | T | T | T | T | T | T | T | T | T | T | T | T | T | T | T | T | T | T | T | T | T | T | T | T | T | T | T | T | T | T | T | T | T | T | T | T | T | T | T | T | T | T | T | T | T | T | T | T | T | T | T | T | T | T | T | T | T | T | T | T | T | T | T | T | T | T | T | T | T | T | T | T | T | T | T | T | T | T | T | T | T | T | T | T | T | T | T | T | T | T | T | T | T | T | T | T | T | T | T | T | T | T | T | T | T | T | T | T | T | T | T | T | T | T | T | T | T | T | T | T | T | T | T | T | T | T | T | T | T | T | T | T | T | T | T | T | T | T | T | T | T | T | T | T | T | T | T | T | T | T | T | T | T | T | T | T | T | T | T | T | T | T | T | T | T | T | T | T | T | T | T | T | T | T | T | T | T | T | T | T | T | T | T | T | T | T | T | T | T | T | T | T | T | T | T | T | T | T | T | T | T | T | T | T | T | T | T | T | T | T | T | T | T | T | T | T | T | T | T | T | T | T | T | T | T | T | T | T | T | T | T | T | T | T | T | T | T | T | T | T | T | T | T | T | T | T | T | T | T | T | T | T | T | T | T | T | T | T | T | T | T | T | T | T | T | T | T | T | T | T | T | T | T | T | T | T | T | T | T | T | T | T | T | T | T | T | T | T | T | T | T | T | T | T | T | T | T | T | T | T | T | T | T | T | T | T | T | T | T | T | T | T | T | T | T | T | T | T | T | T | T | T | T | T | T | T | T | T | T | T | T | T | T | T | T | T | T | T | T | T | T | T | T | T | T | T | T | T | T | T | T | T | T | T | T | T | T | T | T | T | T | T | T | T | T | T | T | T | T | T | T | T | T | T | T | T | T | T | T | T | T | T | T | T | T | T | T | T | T | T | T | T | T | T | T | T | T | T | T | T | T | T | T | T | T | T | T | T | T | T | T | T | T | T | T | T | T | T | T | T | T | T | T | T | T | T | T | T | T | T | T | T | T | T | T | T | T | T | T | T | T | T | T | T | T | T | T | T | T | T | T | T | T | T | T | T | T | T | T | T | T | T | T | T | T | T | T | T | T | T | T | T | T | T | T | T | T | T | T | T | T | T | T | T | T | T | T | T | T | T | T | T | T | T | T | T | T | T | T | T | T | T | T | T | T | T | T | T | T | T | T | T | T | T | T | T | T | T | T | T | T | T | T | T | T | T | T | T | T | T | T | T | T | T | T | T | T | T | T | T | T | T | T | T | T | T | T | T | T | T | T | T | T | T | T | T | T | T | T | T | T | T | T | T | T | T | T | T | T | T | T | T | T | T | T | T | T | T | T | T | T | T | T | T | T | T | T | T | T | T | T | T | T | T | T | T | T | T | T | T | T | T | T | T | T | T | T | T | T | T | T | T | T | T | T | T | T | T | T | T | T | T | T | T | T | T | T | T | T | T | T | T | T | T | T | T | T | T | T | T | T | T | T | T | T | T | T | T | T | T | T | T | T | T | T | T | T | T | T | T | T | T | T | T | T | T | T | T | T | T | T | T | T | T | T | T | T | T | T | T | T | T | T | T | T | T | T | T | T | T | T | T | T | T | T | T | T | T | T | T | T | T | T | T | T | T | T | T | T | T | T | T | T | T | T | T | T | T | T | T | T | T | T | T | T | T | T | T | T | T | T | T | T | T | T | T | T | T | T | T | T | T | T | T | T | T | T | T | T | T | T | T | T | T | T | T | T | T | T | T | T | T | T | T | T | T | T | T | T | T | T | T | T | T | T | T | T | T | T | T | T | T | T | T | T | T | T | T | T | T | T | T | T | T | T | T | T | T | T | T | T | T | T | T | T | T | T | T | T | T | T | T | T | T | T | T | T | T | T | T | T | T | T | T | T | T | T | T | T | T | T | T | T | T | T | T | T | T | T | T | T | T | T | T | T | T | T | T | T | T |

[illegible]

Species/Accession

| Species/Accession                                             | 1 | 2 | 3 | 4 | 5 | 6 | 7 | 8 | 9 | 10 | 11 | 12 | 13 | 14 | 15 | 16 |
|---------------------------------------------------------------|---|---|---|---|---|---|---|---|---|----|----|----|----|----|----|----|
| 1. <i>S. canariensis</i> MW018149 DQ900798                    | A | T | G | T | A | C | T | T | A | A  | C  | C  | G  | A  | A  | T  |
| 2. <i>S. dasynophala</i> AF501993 DQ900803                    | A | T | G | T | A | C | T | T | A | A  | C  | C  | G  | A  | A  | T  |
| 3. <i>S. dendro-chahorra</i> MN783850 DQ900804                | A | T | G | T | A | C | T | T | A | A  | C  | C  | G  | A  | A  | T  |
| 4. <i>S. eriocephala</i> MN783851 AF335646                    | A | T | G | T | A | C | T | T | A | A  | C  | C  | G  | A  | A  | T  |
| 5. <i>S. euboea</i> KT315764 AF335656                         | A | T | G | T | A | C | T | T | A | A  | C  | C  | G  | A  | A  | T  |
| 6. <i>S. gomerae</i> MN783852 AF502036                        | A | T | G | T | A | C | T | T | A | A  | C  | C  | G  | A  | A  | T  |
| 7. <i>S. hyssopifolia</i> AF501995 AF502037                   | A | T | G | T | A | C | T | T | A | A  | C  | C  | G  | A  | A  | T  |
| 8. <i>S. lotaty</i> MN783853 DQ900810                         | A | T | G | T | A | C | T | T | A | A  | C  | C  | G  | A  | A  | T  |
| 9. <i>S. macrostachys</i> MN783854 AF502038                   | A | T | G | T | A | C | T | T | A | A  | C  | C  | G  | A  | A  | T  |
| 10. <i>S. montana</i> AF501997 FJ329771                       | A | T | G | T | A | C | T | T | A | A  | C  | C  | G  | A  | A  | T  |
| 11. <i>S. proteneriflax</i> MN783855 DQ900814                 | A | T | G | T | A | C | T | T | A | A  | C  | C  | G  | A  | A  | T  |
| 12. <i>S. romana</i> AF501998 FJ329772                        | A | T | G | T | A | C | T | T | A | A  | C  | C  | G  | A  | A  | T  |
| 13. <i>S. xanthophylla</i> AF335657                           | A | T | G | T | A | C | T | T | A | A  | C  | C  | G  | A  | A  | T  |
| 14. <i>S. soluta</i> MN783856 DQ900817                        | A | T | G | T | A | C | T | T | A | A  | C  | C  | G  | A  | A  | T  |
| 15. <i>S. syntica</i> AF501999 AF335659                       | A | T | G | T | A | C | T | T | A | A  | C  | C  | G  | A  | A  | T  |
| 16. <i>S. syntica</i> subsp. <i>syntica</i> OR090095 OR090095 | A | T | G | T | A | C | T | T | A | A  | C  | C  | G  | A  | A  | T  |



**Supplementary Material Table S2** Phylogenetic analysis of *Sideritis* taxa using the plastid molecular marker *rbcl*. Alignment of 20 *Sideritis* DNA sequences retrieved from GenBank compared to *Sideritis syriaca* subsp. *syriaca* GR-1-BBGK-15,5939 specimen of the current study (OP909056); the conserved areas (100%) are toggled.

[illegible]

**Supplementary Material Table S3** Phylogenetic analysis of *Sideritis* taxa using the plastid molecular marker *psbA-trnH*. Alignment of 94 *Sideritis* DNA sequences retrieved from GenBank compared to *Sideritis syriaca* subsp. *syriaca* GR-1-BBGK-15,5939 specimen of the current study (OP909054); the conserved areas (100%) are toggled.

[illegible]

Species

1. D. obscura subsp. dendroidea KT63321  
 2. D. obscura subsp. dendroidea KT63348  
 3. D. obscura subsp. dendroidea KT63361  
 4. S. obscura KT633278  
 5. S. obscura KT633277  
 6. S. obscura KT633286  
 7. S. obscura KT633287  
 8. S. obscura KT633289  
 9. S. obscura KT633307  
 10. S. obscura KT633313  
 11. S. obscura KT633362  
 12. S. perfoliata subsp. perfoliata KT633280  
 13. S. perfoliata subsp. perfoliata KT633306  
 14. S. perfoliata subsp. perfoliata KT633364  
 15. S. reserri subsp. reserri KT633275  
 16. S. reserri subsp. reserri KT633278  
 17. S. reserri subsp. reserri KT633279  
 18. S. reserri subsp. reserri KT633283  
 19. S. reserri subsp. reserri KT633284  
 20. S. reserri subsp. reserri KT633285  
 21. S. reserri subsp. reserri KT633286  
 22. S. reserri subsp. reserri KT633289  
 23. S. reserri subsp. reserri KT633290  
 24. S. reserri subsp. reserri KT633291  
 25. S. reserri subsp. reserri KT633293  
 26. S. reserri subsp. reserri KT633295  
 27. S. reserri subsp. reserri KT633297  
 28. S. reserri subsp. reserri KT633298  
 29. S. reserri subsp. reserri KT633300  
 30. S. reserri subsp. reserri KT633301  
 31. S. reserri subsp. reserri KT633308  
 32. S. reserri subsp. reserri KT633314  
 33. S. reserri subsp. reserri KT633315  
 34. S. reserri subsp. reserri KT633323  
 35. S. reserri subsp. reserri KT633324  
 36. S. reserri subsp. reserri KT633325  
 37. S. reserri subsp. reserri KT633333  
 38. S. reserri subsp. reserri KT633334  
 39. S. reserri subsp. reserri KT633335  
 40. S. reserri subsp. reserri KT633336  
 41. S. reserri subsp. reserri KT633340  
 42. S. reserri subsp. reserri KT633342  
 43. S. reserri subsp. reserri KT633353  
 44. S. reserri subsp. reserri KT633354  
 45. S. reserri subsp. reserri KT633358  
 46. S. reserri subsp. reserri KT633359  
 47. S. reserri subsp. reserri KT633362  
 48. S. reserri subsp. reserri KT633366  
 49. S. reserri subsp. reserri KT633368  
 50. S. scutellaria KT633281  
 51. S. scutellaria KT633282  
 52. S. scutellaria KT633292  
 53. S. scutellaria KT633294  
 54. S. scutellaria KT633296  
 55. S. scutellaria KT633309  
 56. S. scutellaria KT633316  
 57. S. scutellaria KT633320  
 58. S. scutellaria KT633322  
 59. S. scutellaria KT633326  
 60. S. scutellaria KT633329  
 61. S. scutellaria KT633330  
 62. S. scutellaria KT633331  
 63. S. scutellaria KT633339  
 64. S. scutellaria KT633343  
 65. S. scutellaria KT633344  
 66. S. scutellaria KT633367  
 67. S. scutellaria KT633368  
 68. S. scutellaria KT633369  
 69. S. scutellaria KT633395  
 70. S. scutellaria vivipara KT633367  
 71. S. scutellaria KT633302  
 72. S. scutellaria KT633303  
 73. S. scutellaria KT633304  
 74. S. scutellaria KT633305  
 75. S. scutellaria KT633310  
 76. S. scutellaria KT633311  
 77. S. scutellaria KT633312  
 78. S. scutellaria KT633317  
 79. S. scutellaria KT633318  
 80. S. scutellaria KT633319  
 81. S. scutellaria KT633332  
 82. S. scutellaria KT633337  
 83. S. scutellaria KT633338  
 84. S. scutellaria KT633341 (Turkey)  
 85. S. scutellaria KT633344  
 86. S. scutellaria KT633345  
 87. S. scutellaria KT633347  
 88. S. scutellaria KT633350  
 89. S. scutellaria KT633361  
 90. S. scutellaria KT633361  
 91. S. scutellaria subsp. scutellaria KT633327  
 92. S. scutellaria subsp. scutellaria KT633328  
 93. S. scutellaria subsp. scutellaria KT633350  
 94. S. scutellaria subsp. scutellaria KT633354  
 95. S. scutellaria subsp. scutellaria KT633346 (Turkey)

1 2 3 4 5 6 7 8 9 10 11 12 13 14 15 16 17 18 19 20 21 22 23 24 25 26 27 28 29 30 31 32 33 34 35 36 37 38 39 40 41 42 43 44 45 46 47 48 49 50 51 52 53 54 55 56 57 58 59 60 61 62 63 64 65 66 67 68 69 70 71 72 73 74 75 76 77 78 79 80 81 82 83 84 85 86 87 88 89 90 91 92 93 94 95 96 97 98 99 100

Species

1. *d. andersonii* subsp. *d. andersonii* KT633321  
2. *d. andersonii* subsp. *d. andersonii* KT633348  
3. *d. andersonii* subsp. *d. andersonii* KT633351  
4. *S. euboea* KT633276  
5. *S. euboea* KT633277  
6. *S. euboea* KT633286  
7. *S. euboea* KT633287  
8. *S. euboea* KT633299  
9. *S. euboea* KT633307  
10. *S. euboea* KT633313  
11. *S. euboea* KT633352  
12. *S. perfoliata* subsp. *perfoliata* KT633260  
13. *S. perfoliata* subsp. *perfoliata* KT633306  
14. *S. perfoliata* subsp. *perfoliata* KT633364  
15. *S. raseisi* subsp. *raseisi* KT633275  
16. *S. raseisi* subsp. *raseisi* KT633278  
17. *S. raseisi* subsp. *raseisi* KT633279  
18. *S. raseisi* subsp. *raseisi* KT633283  
19. *S. raseisi* subsp. *raseisi* KT633284  
20. *S. raseisi* subsp. *raseisi* KT633285  
21. *S. raseisi* subsp. *raseisi* KT633288  
22. *S. raseisi* subsp. *raseisi* KT633289  
23. *S. raseisi* subsp. *raseisi* KT633290  
24. *S. raseisi* subsp. *raseisi* KT633291  
25. *S. raseisi* subsp. *raseisi* KT633293  
26. *S. raseisi* subsp. *raseisi* KT633295  
27. *S. raseisi* subsp. *raseisi* KT633297  
28. *S. raseisi* subsp. *raseisi* KT633298  
29. *S. raseisi* subsp. *raseisi* KT633300  
30. *S. raseisi* subsp. *raseisi* KT633301  
31. *S. raseisi* subsp. *raseisi* KT633308  
32. *S. raseisi* subsp. *raseisi* KT633314  
33. *S. raseisi* subsp. *raseisi* KT633316  
34. *S. raseisi* subsp. *raseisi* KT633323  
35. *S. raseisi* subsp. *raseisi* KT633324  
36. *S. raseisi* subsp. *raseisi* KT633325  
37. *S. raseisi* subsp. *raseisi* KT633333  
38. *S. raseisi* subsp. *raseisi* KT633334  
39. *S. raseisi* subsp. *raseisi* KT633335  
40. *S. raseisi* subsp. *raseisi* KT633336  
41. *S. raseisi* subsp. *raseisi* KT633340  
42. *S. raseisi* subsp. *raseisi* KT633342  
43. *S. raseisi* subsp. *raseisi* KT633353  
44. *S. raseisi* subsp. *raseisi* KT633354  
45. *S. raseisi* subsp. *raseisi* KT633355  
46. *S. raseisi* subsp. *raseisi* KT633356  
47. *S. raseisi* subsp. *raseisi* KT633357  
48. *S. raseisi* subsp. *raseisi* KT633358  
49. *S. raseisi* subsp. *raseisi* KT633359  
50. *S. xanadica* KT633281  
51. *S. xanadica* KT633282  
52. *S. xanadica* KT633282  
53. *S. xanadica* KT633284  
54. *S. xanadica* KT633296  
55. *S. xanadica* KT633309  
56. *S. xanadica* KT633316  
57. *S. xanadica* KT633320  
58. *S. xanadica* KT633322  
59. *S. xanadica* KT633326  
60. *S. xanadica* KT633329  
61. *S. xanadica* KT633330  
62. *S. xanadica* KT633331  
63. *S. xanadica* KT633339  
64. *S. xanadica* KT633343  
65. *S. xanadica* KT633348  
66. *S. xanadica* KT633357  
67. *S. xanadica* KT633358  
68. *S. xanadica* KT633363  
69. *S. xanadica* KT633365  
70. *S. xanadica* voucher KT633367  
71. *S. xiphioides* KT633302  
72. *S. xiphioides* KT633303  
73. *S. xiphioides* KT633304  
74. *S. xiphioides* KT633305  
75. *S. xiphioides* KT633310  
76. *S. xiphioides* KT633311  
77. *S. xiphioides* KT633312  
78. *S. xiphioides* KT633317  
79. *S. xiphioides* KT633318  
80. *S. xiphioides* KT633319  
81. *S. xiphioides* KT633332  
82. *S. xiphioides* KT633337  
83. *S. xiphioides* KT633338  
84. *S. xiphioides* KT633341 (Turkey)  
85. *S. xiphioides* KT633344  
86. *S. xiphioides* KT633345  
87. *S. xiphioides* KT633347  
88. *S. xiphioides* KT633359  
89. *S. xiphioides* KT633360  
90. *S. xiphioides* KT633361  
91. *S. xiphioides* subsp. *xiphioides* KT633327  
92. *S. xiphioides* subsp. *xiphioides* KT633328  
93. *S. xiphioides* subsp. *xiphioides* KT633350  
94. *S. xiphioides* subsp. *xiphioides* OR909054  
95. *S. xiphioides* KT633346 (Turkey)

1. *d. andersonii* subsp. *d. andersonii* KT633321  
2. *d. andersonii* subsp. *d. andersonii* KT633348  
3. *d. andersonii* subsp. *d. andersonii* KT633351  
4. *S. euboea* KT633276  
5. *S. euboea* KT633277  
6. *S. euboea* KT633286  
7. *S. euboea* KT633287  
8. *S. euboea* KT633299  
9. *S. euboea* KT633307  
10. *S. euboea* KT633313  
11. *S. euboea* KT633352  
12. *S. perfoliata* subsp. *perfoliata* KT633260  
13. *S. perfoliata* subsp. *perfoliata* KT633306  
14. *S. perfoliata* subsp. *perfoliata* KT633364  
15. *S. raseisi* subsp. *raseisi* KT633275  
16. *S. raseisi* subsp. *raseisi* KT633278  
17. *S. raseisi* subsp. *raseisi* KT633279  
18. *S. raseisi* subsp. *raseisi* KT633283  
19. *S. raseisi* subsp. *raseisi* KT633284  
20. *S. raseisi* subsp. *raseisi* KT633285  
21. *S. raseisi* subsp. *raseisi* KT633288  
22. *S. raseisi* subsp. *raseisi* KT633289  
23. *S. raseisi* subsp. *raseisi* KT633290  
24. *S. raseisi* subsp. *raseisi* KT633291  
25. *S. raseisi* subsp. *raseisi* KT633293  
26. *S. raseisi* subsp. *raseisi* KT633295  
27. *S. raseisi* subsp. *raseisi* KT633297  
28. *S. raseisi* subsp. *raseisi* KT633298  
29. *S. raseisi* subsp. *raseisi* KT633300  
30. *S. raseisi* subsp. *raseisi* KT633301  
31. *S. raseisi* subsp. *raseisi* KT633308  
32. *S. raseisi* subsp. *raseisi* KT633314  
33. *S. raseisi* subsp. *raseisi* KT633316  
34. *S. raseisi* subsp. *raseisi* KT633323  
35. *S. raseisi* subsp. *raseisi* KT633324  
36. *S. raseisi* subsp. *raseisi* KT633325  
37. *S. raseisi* subsp. *raseisi* KT633333  
38. *S. raseisi* subsp. *raseisi* KT633334  
39. *S. raseisi* subsp. *raseisi* KT633335  
40. *S. raseisi* subsp. *raseisi* KT633336  
41. *S. raseisi* subsp. *raseisi* KT633340  
42. *S. raseisi* subsp. *raseisi* KT633342  
43. *S. raseisi* subsp. *raseisi* KT633353  
44. *S. raseisi* subsp. *raseisi* KT633354  
45. *S. raseisi* subsp. *raseisi*

| Accession                                    | Sequence            | Position | Conservation |
|----------------------------------------------|---------------------|----------|--------------|
| 1. S. danio rerio subsp. danio rerio K033221 | T T A A A - - - A - | 97       | 100%         |
| 2. S. danio rerio subsp. danio rerio K033240 | T T A A A - - - A - | 97       | 100%         |
| 3. S. danio rerio subsp. danio rerio K033251 | T T A A A - - - A - | 97       | 100%         |
| 4. S. subsp. K033276                         | T T A A A - - - A - | 97       | 100%         |
| 5. S. subsp. K033277                         | T T A A A - - - A - | 97       | 100%         |
| 6. S. subsp. K033286                         | T T A A A - - - A - | 97       | 100%         |
| 7. S. subsp. K033287                         | T T A A A - - - A - | 97       | 100%         |
| 8. S. subsp. K033299                         | T T A A A - - - A - | 97       | 100%         |
| 9. S. subsp. K033307                         | T T A A A - - - A - | 97       | 100%         |
| 10. S. subsp. K033319                        | T T A A A - - - A - | 97       | 100%         |
| 11. S. subsp. K033352                        | T T A A A - - - A - | 97       | 100%         |
| 12. S. perlati subsp. perlati K033280        | T T A A A - - - A - | 97       | 100%         |
| 13. S. perlati subsp. perlati K033306        | T T A A A - - - A - | 97       | 100%         |
| 14. S. perlati subsp. perlati K033364        | T T A A A - - - A - | 97       | 100%         |
| 15. S. reiseri subsp. reiseri K033275        | T T A A A - - - A - | 97       | 100%         |
| 16. S. reiseri subsp. reiseri K033278        | T T A A A - - - A - | 97       | 100%         |
| 17. S. reiseri subsp. reiseri K033279        | T T A A A - - - A - | 97       | 100%         |
| 18. S. reiseri subsp. reiseri K033283        | T T A A A - - - A - | 97       | 100%         |
| 19. S. reiseri subsp. reiseri K033284        | T T A A A - - - A - | 97       | 100%         |
| 20. S. reiseri subsp. reiseri K033285        | T T A A A - - - A - | 97       | 100%         |
| 21. S. reiseri subsp. reiseri K033288        | T T A A A - - - A - | 97       | 100%         |
| 22. S. reiseri subsp. reiseri K033289        | T T A A A - - - A - | 97       | 100%         |
| 23. S. reiseri subsp. reiseri K033290        | T T A A A - - - A - | 97       | 100%         |
| 24. S. reiseri subsp. reiseri K033291        | T T A A A - - - A - | 97       | 100%         |
| 25. S. reiseri subsp. reiseri K033293        | T T A A A - - - A - | 97       | 100%         |
| 26. S. reiseri subsp. reiseri K033295        | T T A A A - - - A - | 97       | 100%         |
| 27. S. reiseri subsp. reiseri K033297        | T T A A A - - - A - | 97       | 100%         |
| 28. S. reiseri subsp. reiseri K033298        | T T A A A - - - A - | 97       | 100%         |
| 29. S. reiseri subsp. reiseri K033300        | T T A A A - - - A - | 97       | 100%         |
| 30. S. reiseri subsp. reiseri K033301        | T T A A A - - - A - | 97       | 100%         |
| 31. S. reiseri subsp. reiseri K033308        | T T A A A - - - A - | 97       | 100%         |
| 32. S. reiseri subsp. reiseri K033314        | T T A A A - - - A - | 97       | 100%         |
| 33. S. reiseri subsp. reiseri K033315        | T T A A A - - - A - | 97       | 100%         |
| 34. S. reiseri subsp. reiseri K033323        | T T A A A - - - A - | 97       | 100%         |
| 35. S. reiseri subsp. reiseri K033324        | T T A A A - - - A - | 97       | 100%         |
| 36. S. reiseri subsp. reiseri K033325        | T T A A A - - - A - | 97       | 100%         |
| 37. S. reiseri subsp. reiseri K033330        | T T A A A - - - A - | 97       | 100%         |
| 38. S. reiseri subsp. reiseri K033334        | T T A A A - - - A - | 97       | 100%         |
| 39. S. reiseri subsp. reiseri K033335        | T T A A A - - - A - | 97       | 100%         |
| 40. S. reiseri subsp. reiseri K033336        | T T A A A - - - A - | 97       | 100%         |
| 41. S. reiseri subsp. reiseri K033340        | T T A A A - - - A - | 97       | 100%         |
| 42. S. reiseri subsp. reiseri K033342        | T T A A A - - - A - | 97       | 100%         |
| 43. S. reiseri subsp. reiseri K033353        | T T A A A - - - A - | 97       | 100%         |
| 44. S. reiseri subsp. reiseri K033354        | T T A A A - - - A - | 97       | 100%         |
| 45. S. reiseri subsp. reiseri K033355        | T T A A A - - - A - | 97       | 100%         |
| 46. S. reiseri subsp. reiseri K033356        | T T A A A - - - A - | 97       | 100%         |
| 47. S. reiseri subsp. reiseri K033362        | T T A A A - - - A - | 97       | 100%         |
| 48. S. reiseri subsp. reiseri K033365        | T T A A A - - - A - | 97       | 100%         |
| 49. S. reiseri subsp. reiseri K033366        | T T A A A - - - A - | 97       | 100%         |
| 50. S. xanadu K033281                        | T T A A A - - - A - | 97       | 100%         |
| 51. S. xanadu K033282                        | T T A A A - - - A - | 97       | 100%         |
| 52. S. xanadu K033282                        | T T A A A - - - A - | 97       | 100%         |
| 53. S. xanadu K033284                        | T T A A A - - - A - | 97       | 100%         |
| 54. S. xanadu K033296                        | T T A A A - - - A - | 97       | 100%         |
| 55. S. xanadu K033309                        | T T A A A - - - A - | 97       | 100%         |
| 56. S. xanadu K033316                        | T T A A A - - - A - | 97       | 100%         |
| 57. S. xanadu K033320                        | T T A A A - - - A - | 97       | 100%         |
| 58. S. xanadu K033322                        | T T A A A - - - A - | 97       | 100%         |
| 59. S. xanadu K033326                        | T T A A A - - - A - | 97       | 100%         |
| 60. S. xanadu K033329                        | T T A A A - - - A - | 97       | 100%         |
| 61. S. xanadu K033330                        | T T A A A - - - A - | 97       | 100%         |
| 62. S. xanadu K033331                        | T T A A A - - - A - | 97       | 100%         |
| 63. S. xanadu K033339                        | T T A A A - - - A - | 97       | 100%         |
| 64. S. xanadu K033343                        | T T A A A - - - A - | 97       | 100%         |
| 65. S. xanadu K033348                        | T T A A A - - - A - | 97       | 100%         |
| 66. S. xanadu K033357                        | T T A A A - - - A - | 97       | 100%         |
| 67. S. xanadu K033358                        | T T A A A - - - A - | 97       | 100%         |
| 68. S. xanadu K033363                        | T T A A A - - - A - | 97       | 100%         |
| 69. S. xanadu K033365                        | T T A A A - - - A - | 97       | 100%         |
| 70. S. xanadu xanadu K033367                 | T T A A A - - - A - | 97       | 100%         |
| 71. S. lythra K033302                        | T T A A A - - - A - | 97       | 100%         |
| 72. S. lythra K033303                        | T T A A A - - - A - | 97       | 100%         |
| 73. S. lythra K033304                        | T T A A A - - - A - | 97       | 100%         |
| 74. S. lythra K033305                        | T T A A A - - - A - | 97       | 100%         |
| 75. S. lythra K033310                        | T T A A A - - - A - | 97       | 100%         |
| 76. S. lythra K033311                        | T T A A A - - - A - | 97       | 100%         |
| 77. S. lythra K033312                        | T T A A A - - - A - | 97       | 100%         |
| 78. S. lythra K033317                        | T T A A A - - - A - | 97       | 100%         |
| 79. S. lythra K033318                        | T T A A A - - - A - | 97       | 100%         |
| 80. S. lythra K033319                        | T T A A A - - - A - | 97       | 100%         |
| 81. S. lythra K033320                        | T T A A A - - - A - | 97       | 100%         |
| 82. S. lythra K033327                        | T T A A A - - - A - | 97       | 100%         |
| 83. S. lythra K033338                        | T T A A A - - - A - | 97       | 100%         |
| 84. S. lythra K033341 (Turkey)               | T T A A A - - - A - | 97       | 100%         |
| 85. S. lythra K033344                        | T T A A A - - - A - | 97       | 100%         |
| 86. S. lythra K033345                        | T T A A A - - - A - | 97       | 100%         |
| 87. S. lythra K033347                        | T T A A A - - - A - | 97       | 100%         |
| 88. S. lythra K033359                        | T T A A A - - - A - | 97       | 100%         |
| 89. S. lythra K033360                        | T T A A A - - - A - | 97       | 100%         |
| 90. S. lythra K033369                        | T T A A A - - - A - | 97       | 100%         |
| 91. S. lythra subsp. lythra K033327          | T T A A A - - - A - | 97       | 100%         |
| 92. S. lythra subsp. lythra K033328          | T T A A A - - - A - | 97       | 100%         |
| 93. S. lythra subsp. lythra K033350          | T T A A A - - - A - | 97       | 100%         |
| 94. S. lythra subsp. lythra K033354          | T T A A A - - - A - | 97       | 100%         |
| 95. S. lythra K033346 (Turkey)               | T T A A A - - - A - | 97       | 100%         |

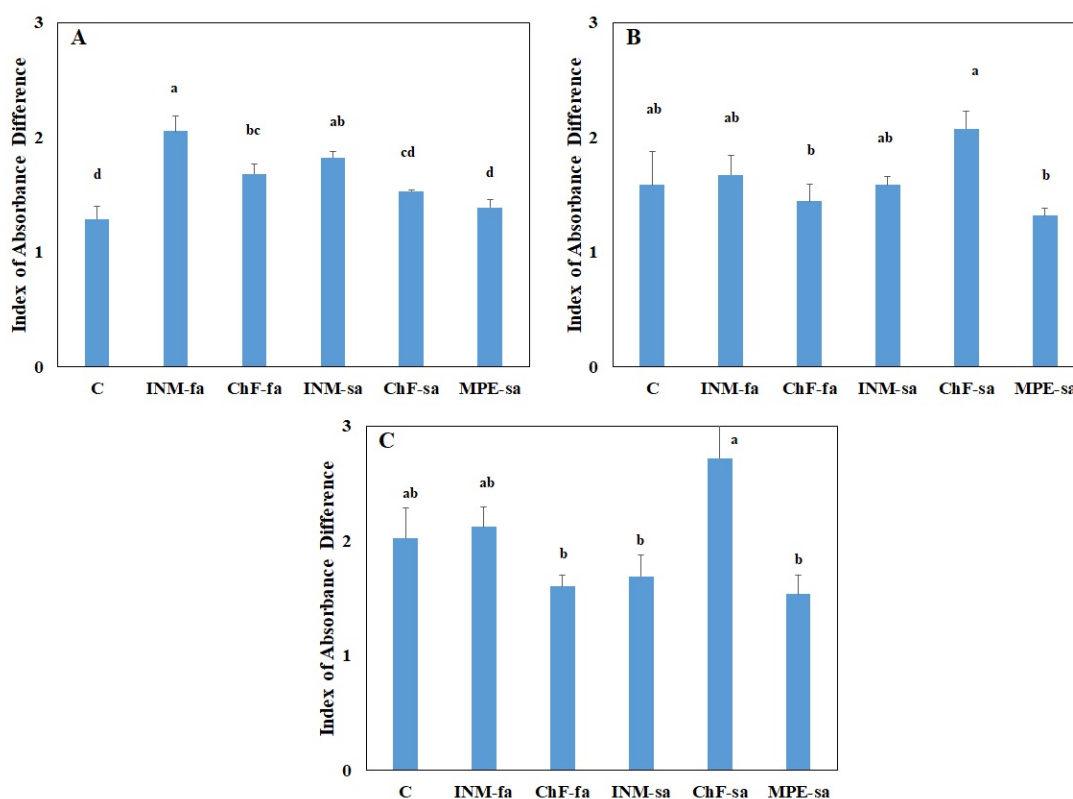

**Supplementary Figure S1.** Effect of fertilization scheme applied through foliar or soil on leaf index of absorbance difference of *Sideritis syriaca* subsp. *syriaca* at vegetative (A), early flowering (B), and full flowering (C) stage. C: Control (water); INM-fa: Integrated nutrient management (INM) by foliar application; ChF-fa: Conventional inorganic fertilization (ChF) by foliar application; INM-sa: INM by soil application; ChF-sa: ChF by soil application; MPE-sa: Mixture of plant extracts as biostimulant by soil application (THEOMASS). Columns represent the mean of three replicates  $\pm$  SEM. Within each plot, different letters indicate significant differences among means.

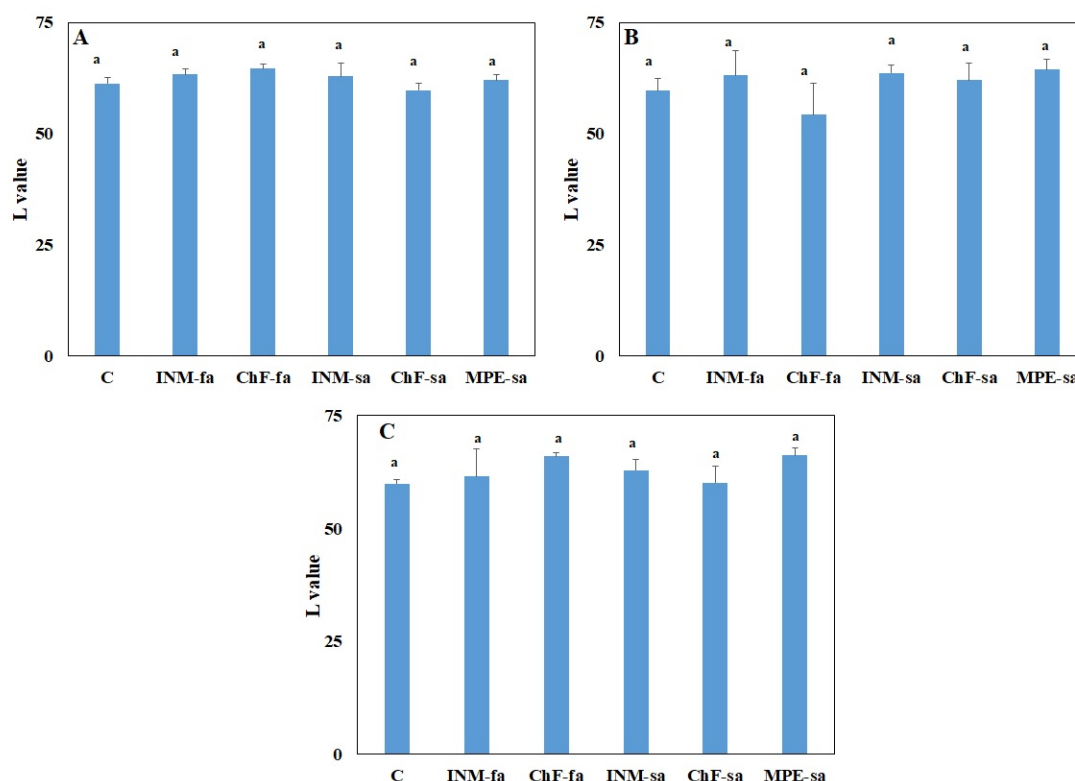

**Supplementary Figure S2.** Effect of fertilization scheme applied through foliar or soil on leaf L value of *Sideritis syriaca* subsp. *syriaca* at vegetative (A), early flowering (B), and full flowering (C) stage. C: Control (water); INM-fa: Integrated nutrient management (INM) by foliar application; ChF-fa: Conventional inorganic (ChF) fertilization by foliar application; INM-sa: INM by soil application; ChF-sa: ChF by soil application; MPE-sa: Mixture of plant extracts as biostimulant by soil application (THEOMASS). Columns represent the mean of three replicates  $\pm$  SEM. Within each plot, different letters indicate significant differences among means.

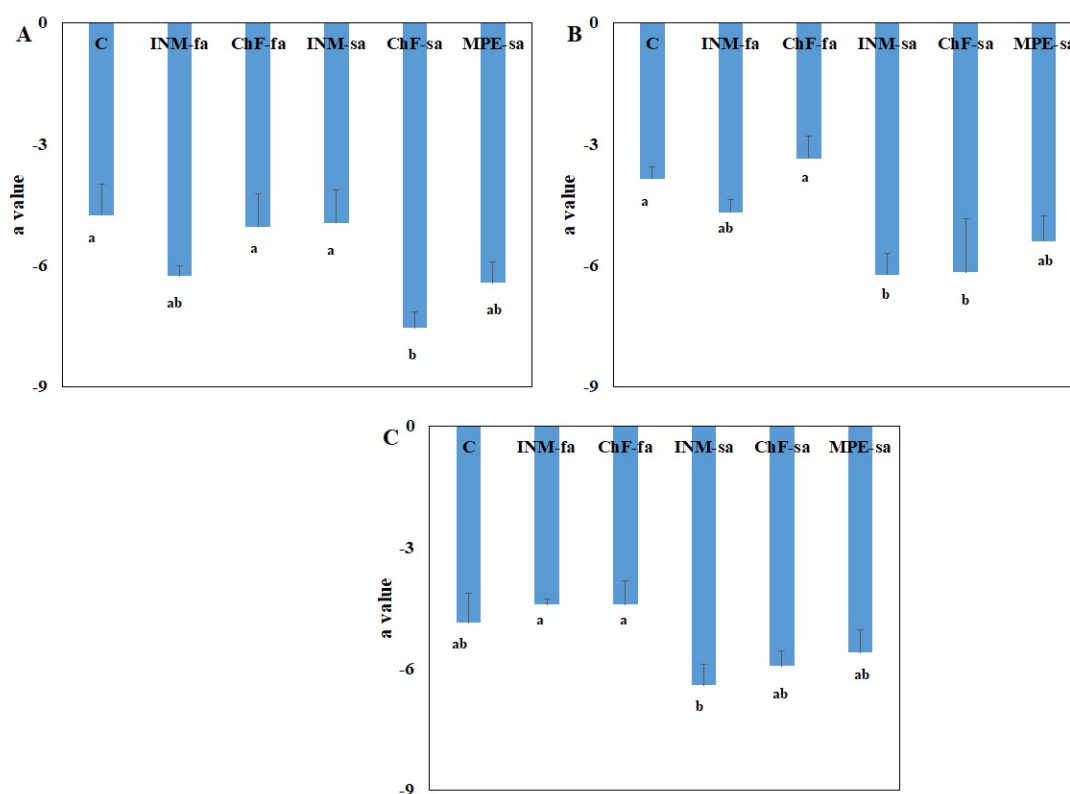

**Supplementary Figure S3.** Effect of fertilization scheme applied through foliar or soil on leaf a value of *Sideritis syriaca* subsp. *syriaca* at vegetative (A), early flowering (B), and full flowering (C) stage. C: Control (water); INM-fa: Integrated nutrient management (INM) by foliar application; ChF-fa: Conventional inorganic fertilization (ChF) by foliar application; INM-sa: INM by soil application; ChF-sa: ChF by soil application; MPE-sa: Mixture of plant extracts as biostimulant by soil application (THEOMASS). Columns represent the mean of three replicates  $\pm$  SEM. Within each plot, different letters indicate significant differences among means.

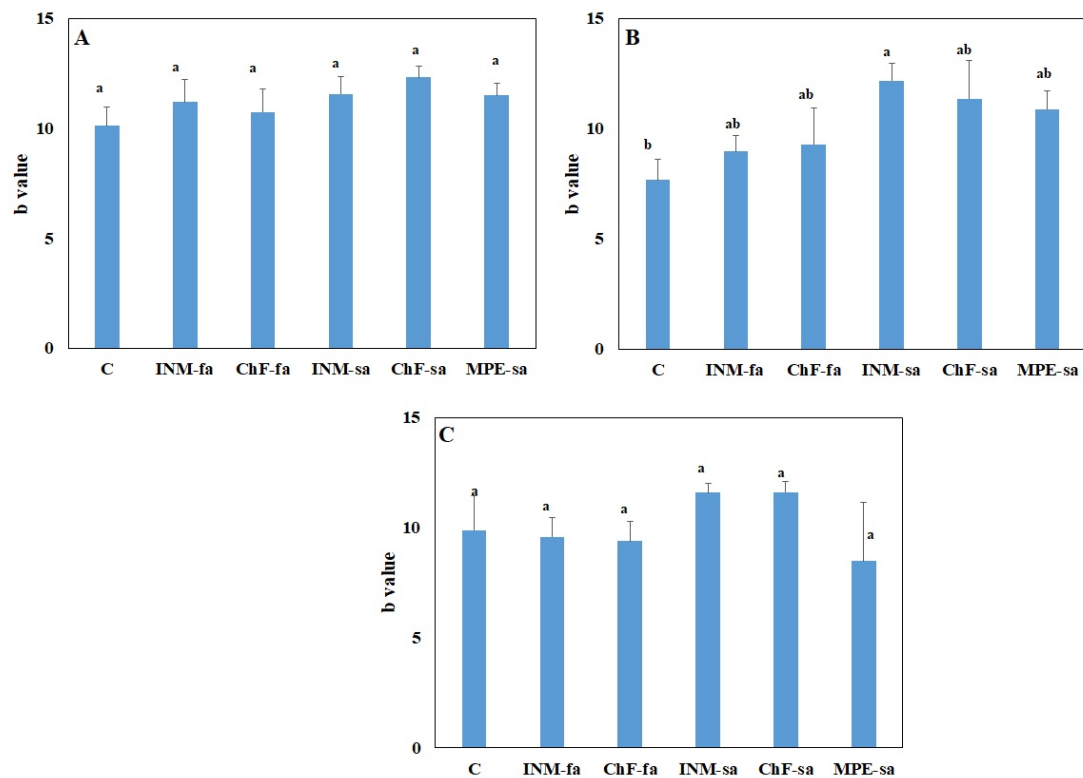

**Supplementary Figure S4.** Effect of fertilization scheme applied through foliar or soil on leaf b value of *Sideritis syriaca* subsp. *syriaca* at vegetative (A), early flowering (B), and full flowering (C) stage. C: Control (water); INM-fa: Integrated nutrient management (INM) by foliar application; ChF-fa: Conventional inorganic fertilization (ChF) by foliar application; INM-sa: INM by soil application; ChF-sa: ChF by soil application; MPE-sa: Mixture of plant extracts as biostimulant by soil application (THEOMASS). Columns represent the mean of three replicates  $\pm$  SEM. Within each plot, different letters indicate significant differences among means.
